# Supplementary figures and images for: Tumor suppressive role of sestrin2 during colitis and colon carcinogenesis
Source: eLife journal article supplement (doi:10.7554/elife.12204), 2016-02-25

**Fig 7—figure supplement 2**

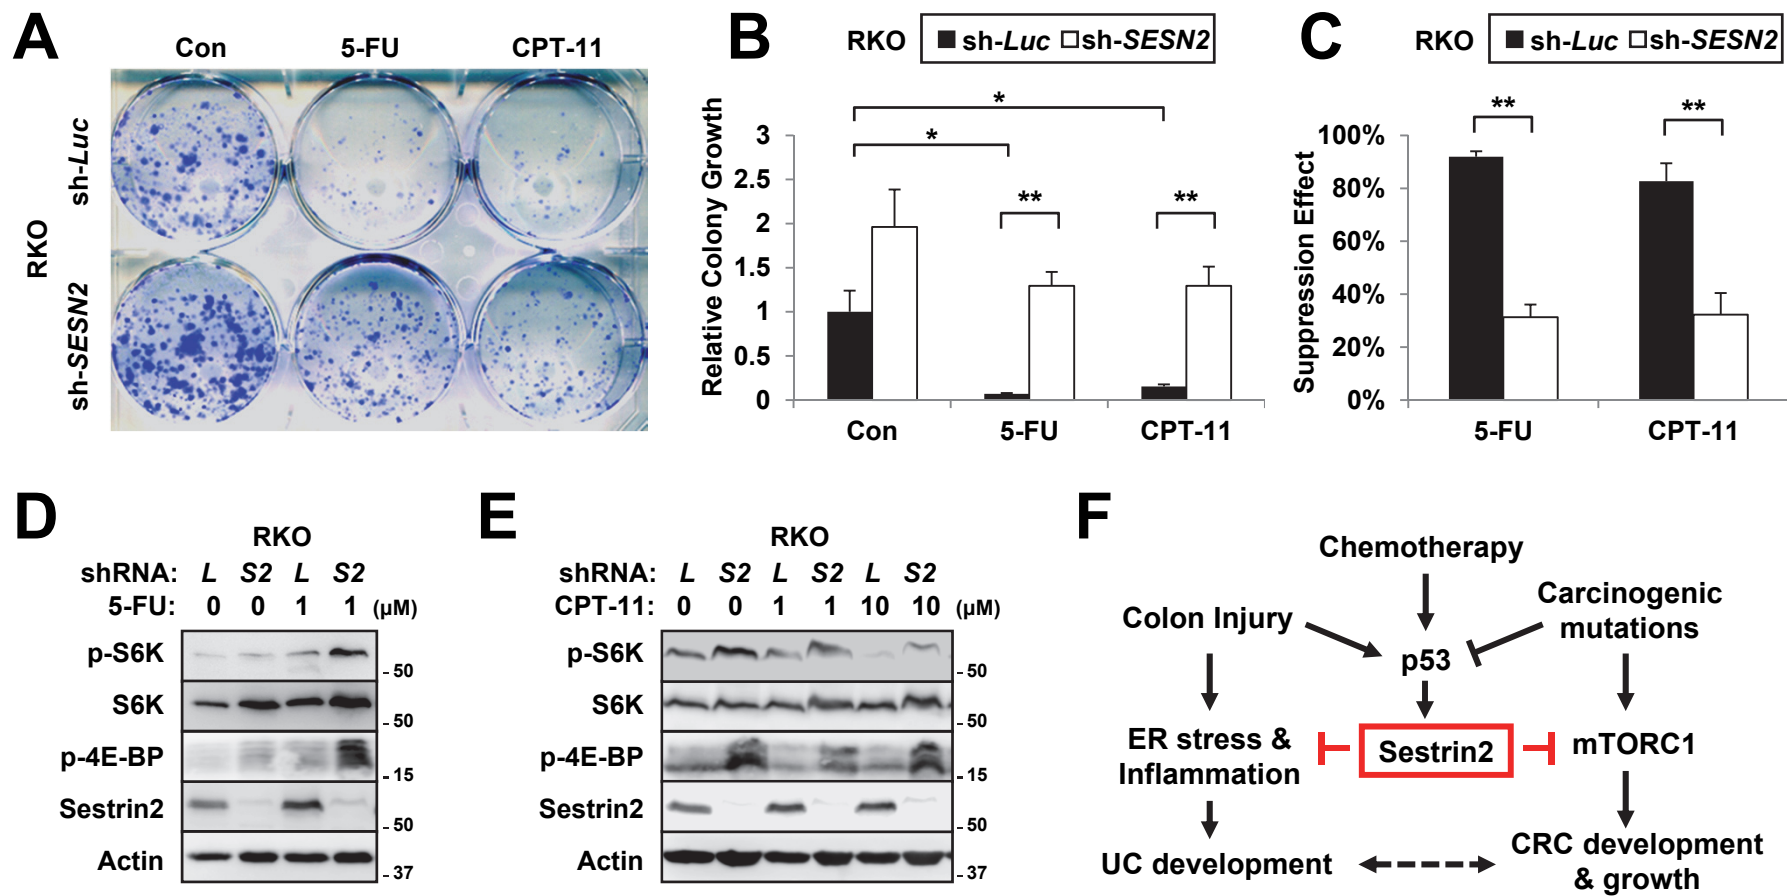

Supplement: supp [file elife-12204-supp-v1.zip]

Fig 4—figure supplement 1

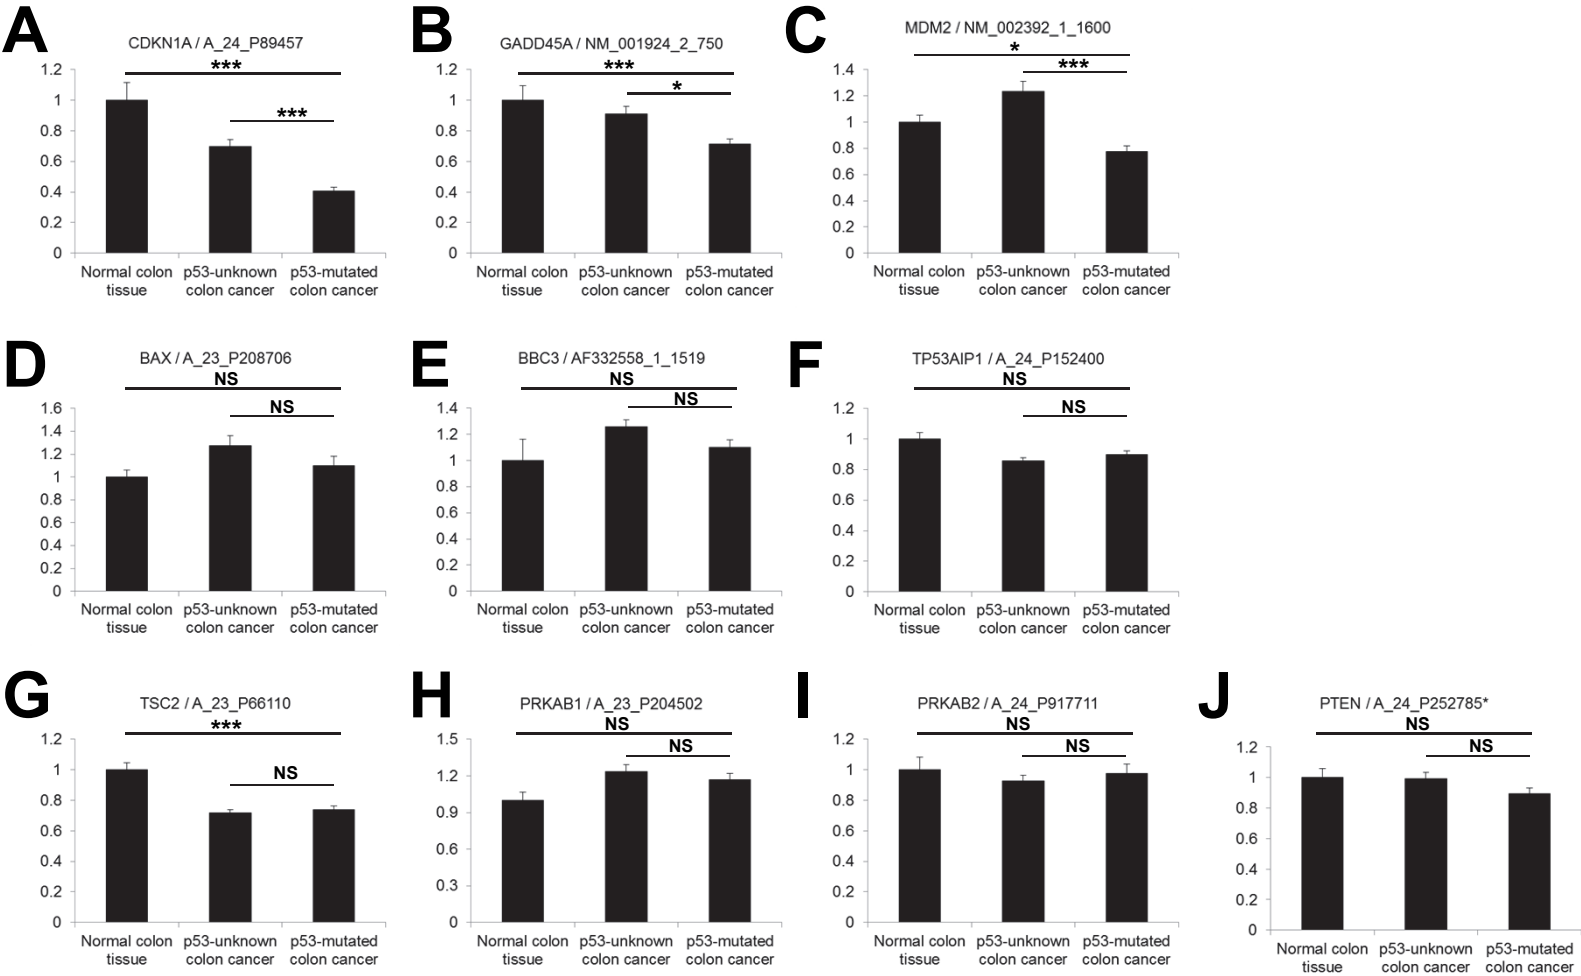

Supplement: supp [file elife-12204-supp-v1.zip]

**Fig 2—figure supplement 2**

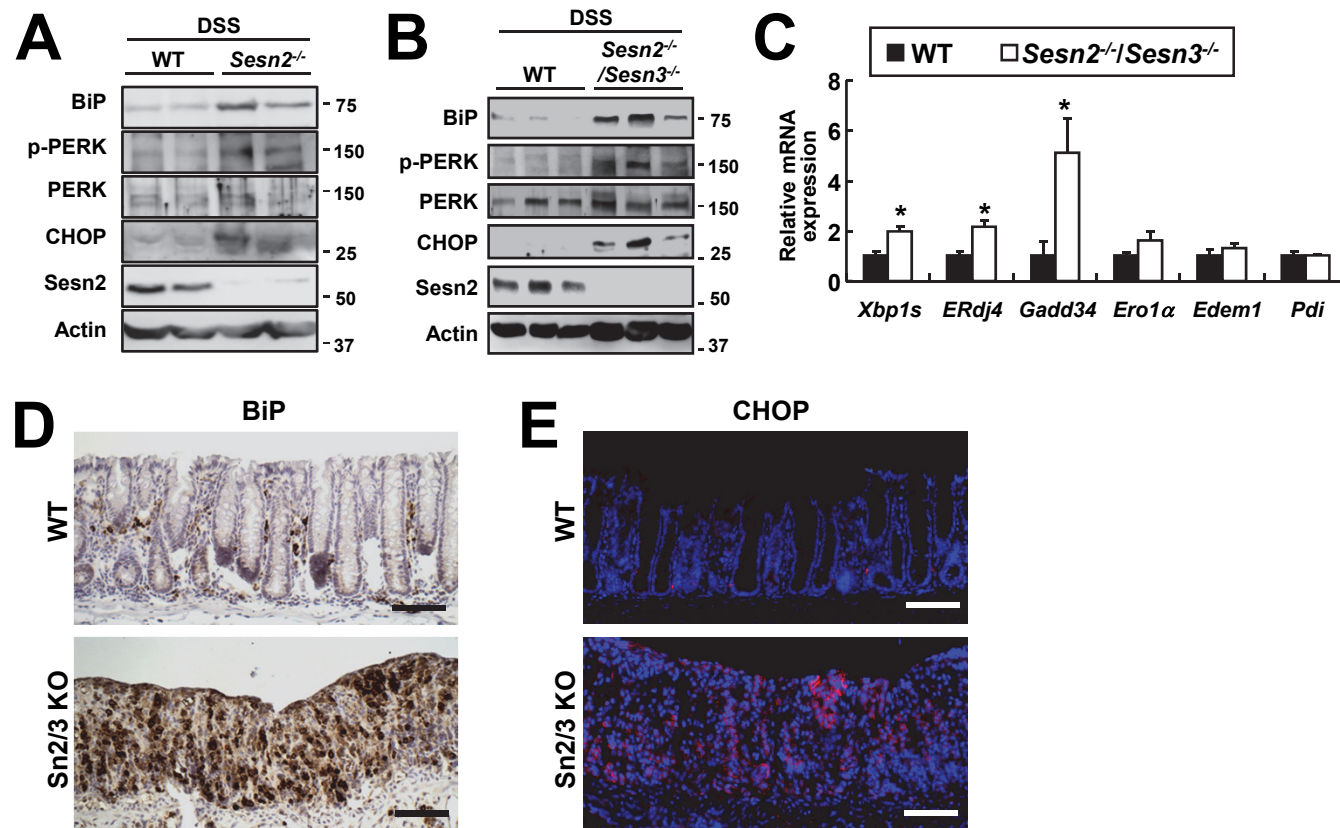

Supplement: supp [file elife-12204-supp-v1.zip]

**Fig 6—figure supplement 2**

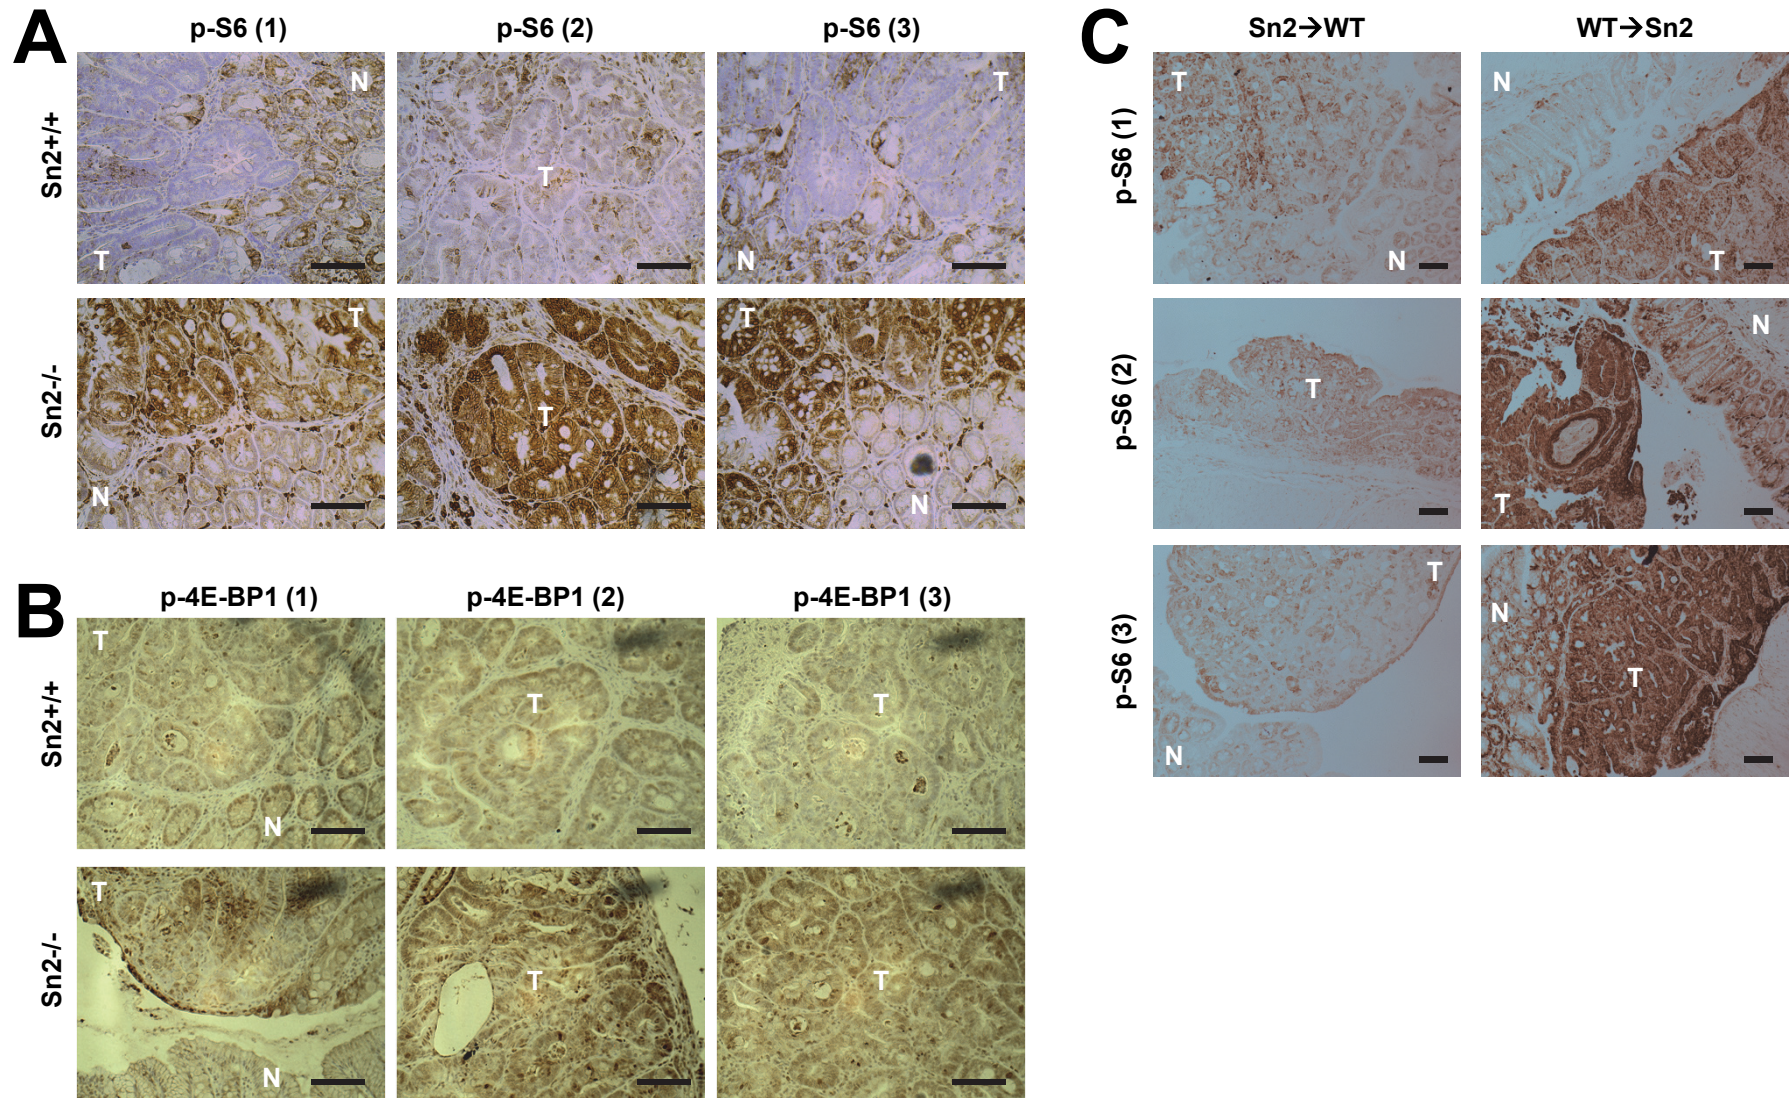

Supplement: supp [file elife-12204-supp-v1.zip]

**Fig 7—figure supplement 1**

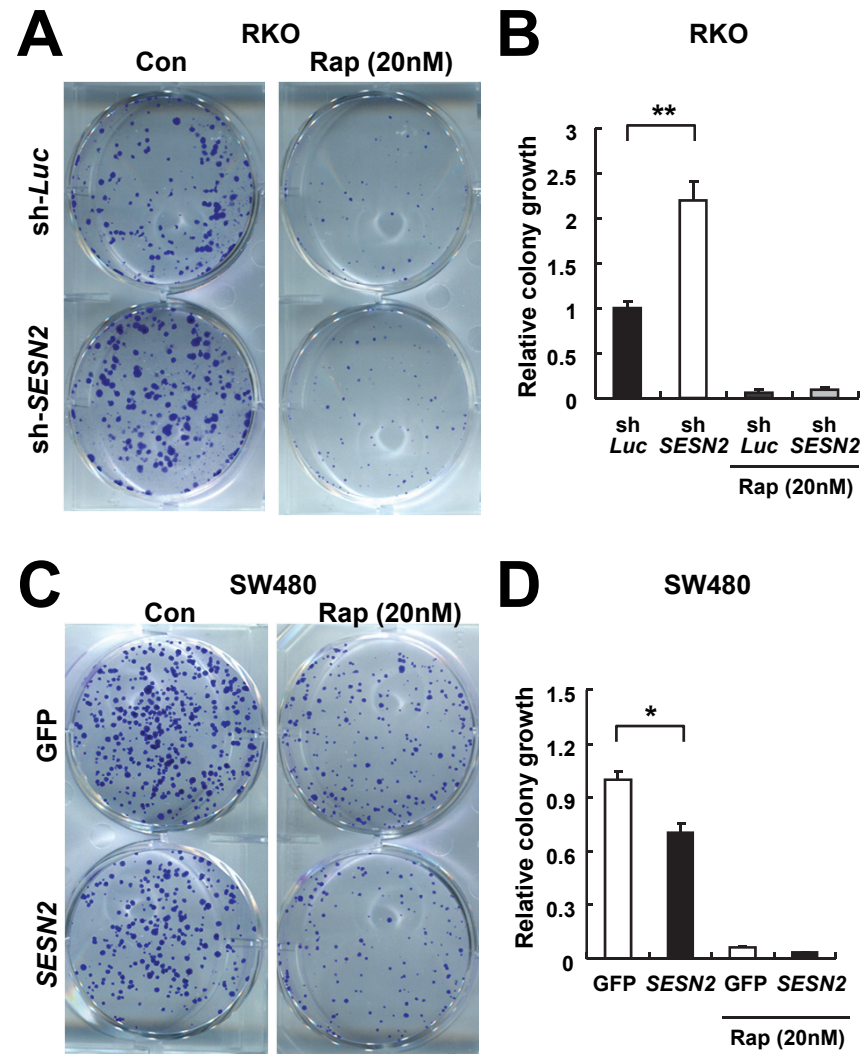

Supplement: supp [file elife-12204-supp-v1.zip]

**Fig 1—figure supplement 2**

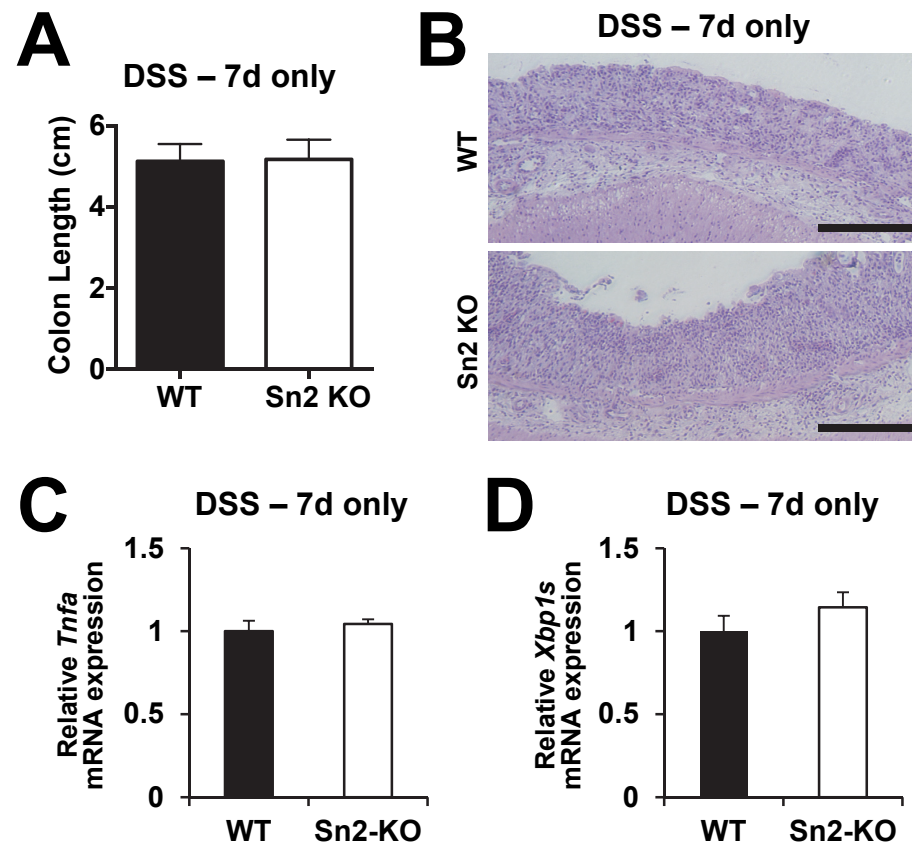

Supplement: supp [file elife-12204-supp-v1.zip]

# Fig 3—figure supplement 1

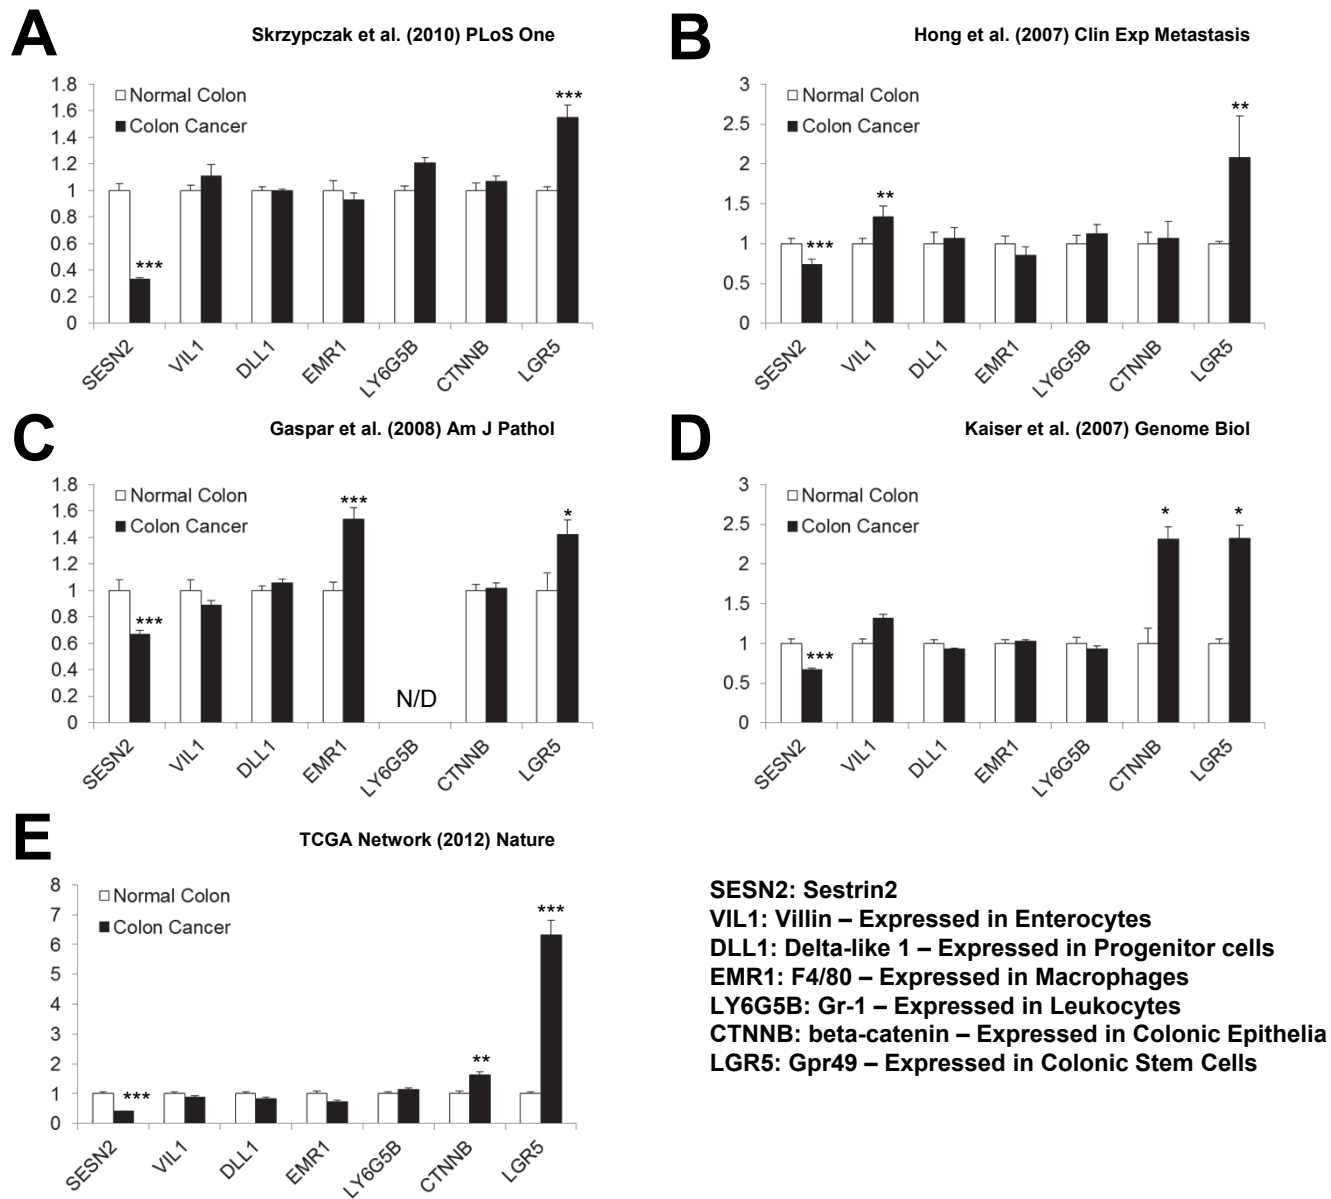

Supplement: supp [file elife-12204-supp-v1.zip]

# Fig 7—figure supplement 3

Fig. 7A

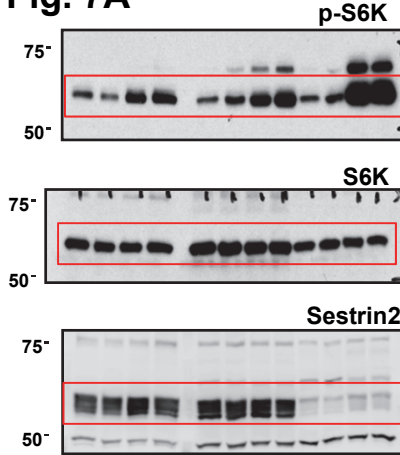

Fig. 7B

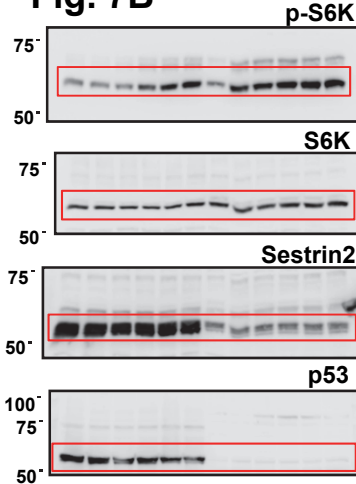

Fig. 7C

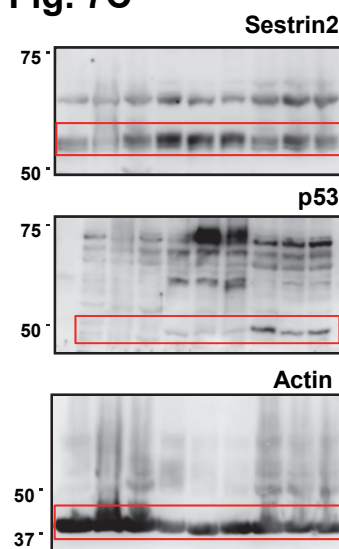

Fig. 7D

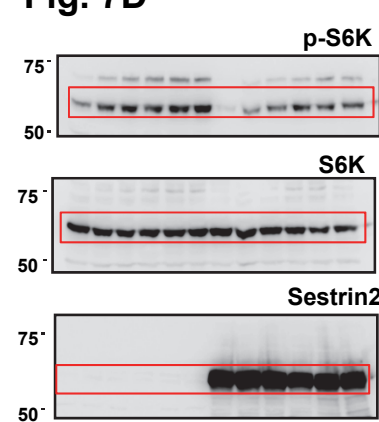

Fig. 7—fig. supp. 2D

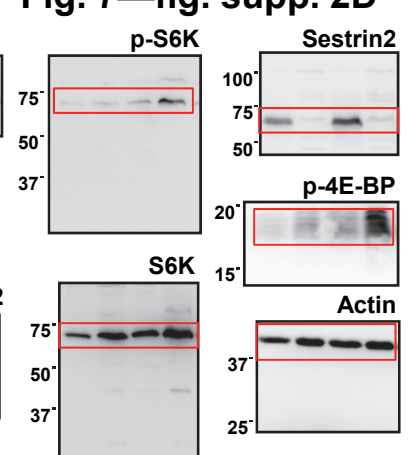

Fig. 7—fig. supp. 2E

Fig. 7E

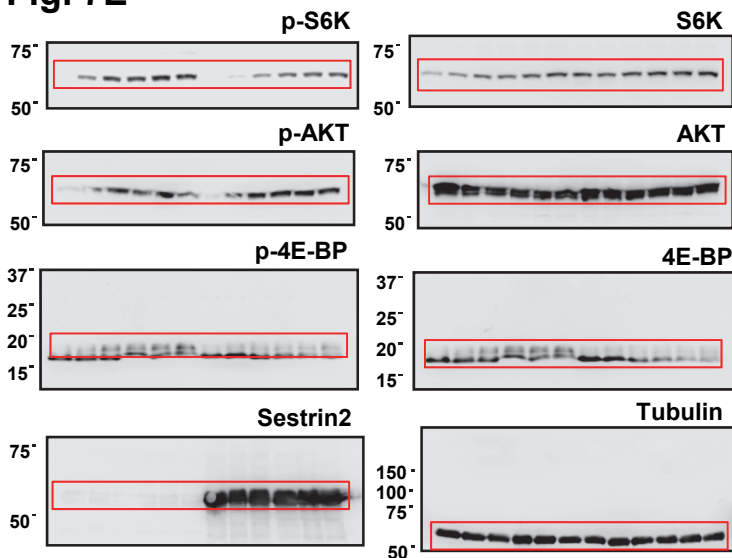

Fig. 7F

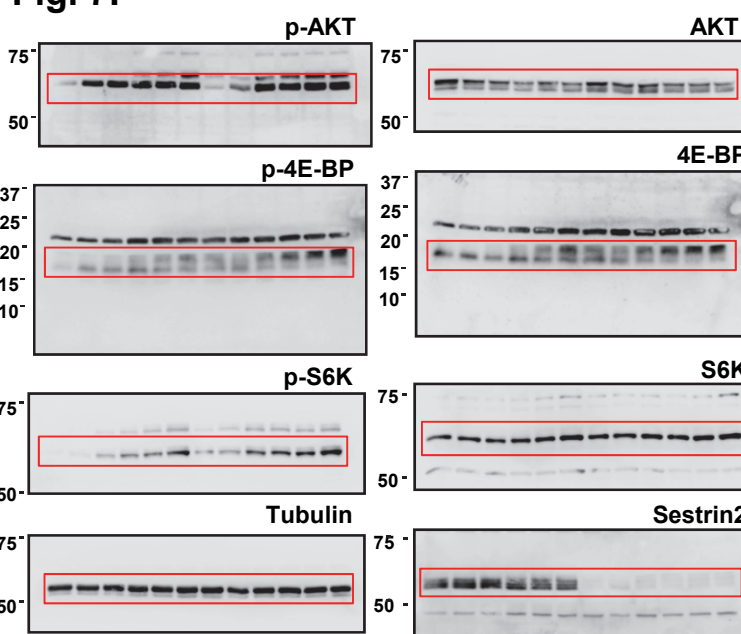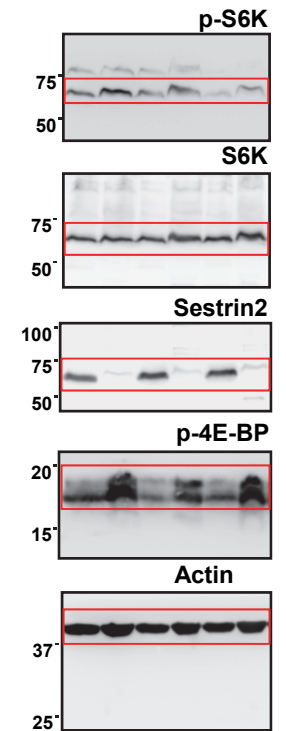

Supplement: supp [file elife-12204-supp-v1.zip]

## Fig 2—figure supplement 3

**Fig. 2E**

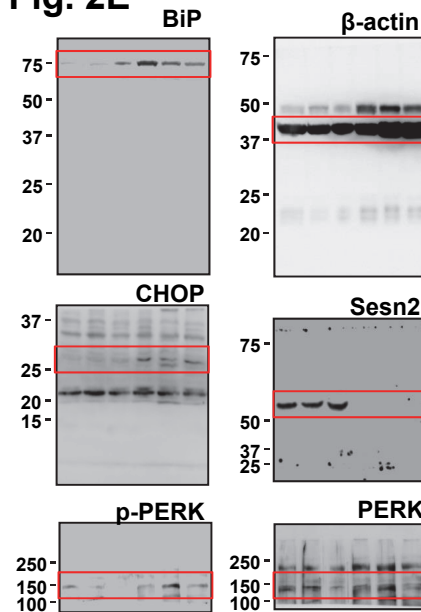

**Fig. 2—figure  
supp. 1D**

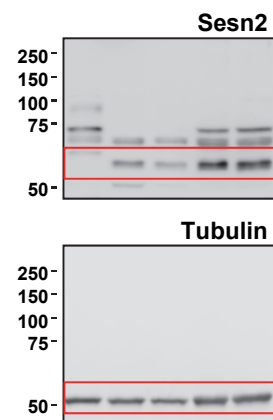

**Fig. 2—figure supp. 2A**

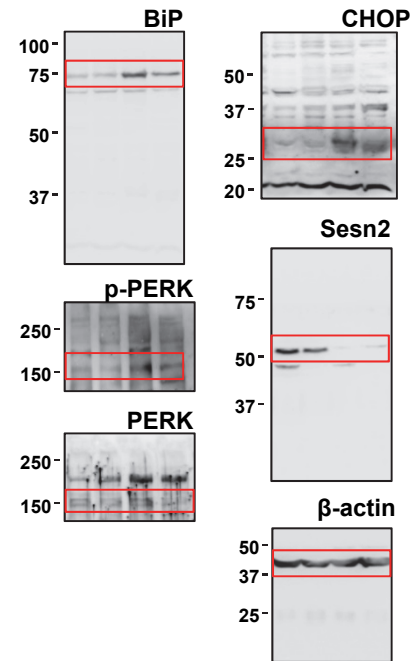

**Fig. 2—figure supp. 2B**

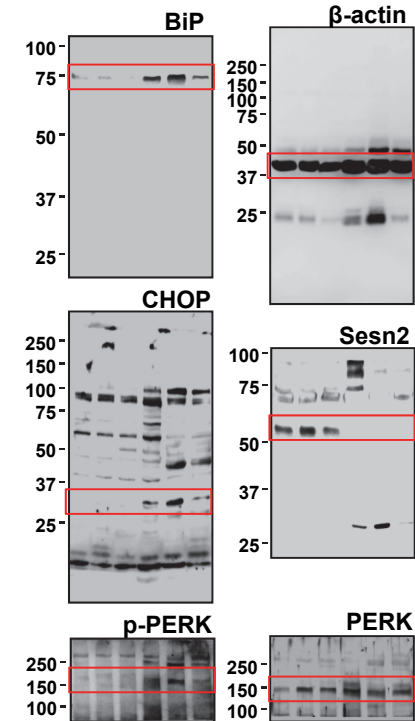

Supplement: supp [file elife-12204-supp-v1.zip]

**Fig 1—figure supplement 1**

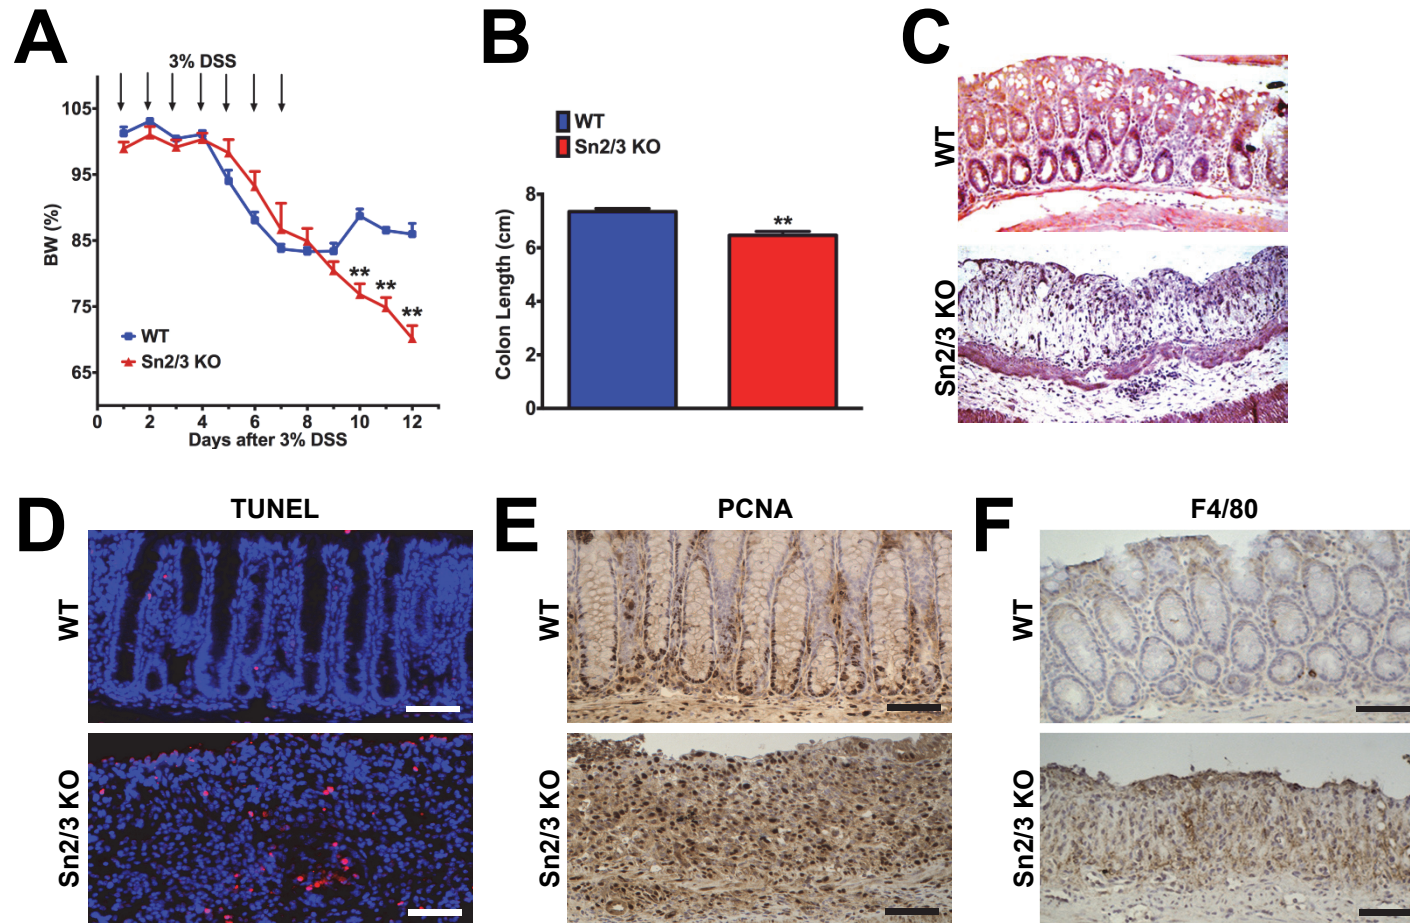

Supplement: supp [file elife-12204-supp-v1.zip]

Fig 6—figure supplement 3

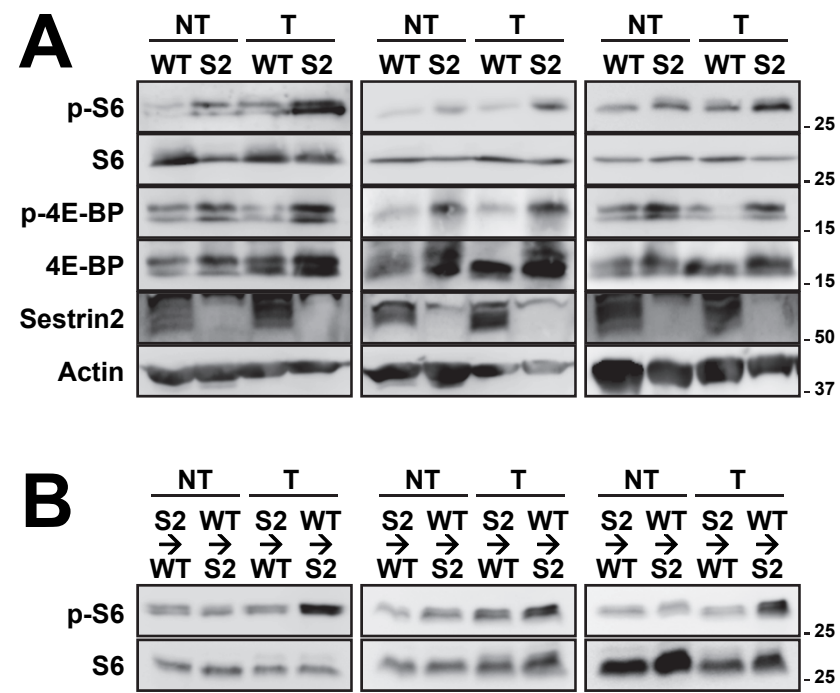

Supplement: supp [file elife-12204-supp-v1.zip]

# Fig 2—figure supplement 1

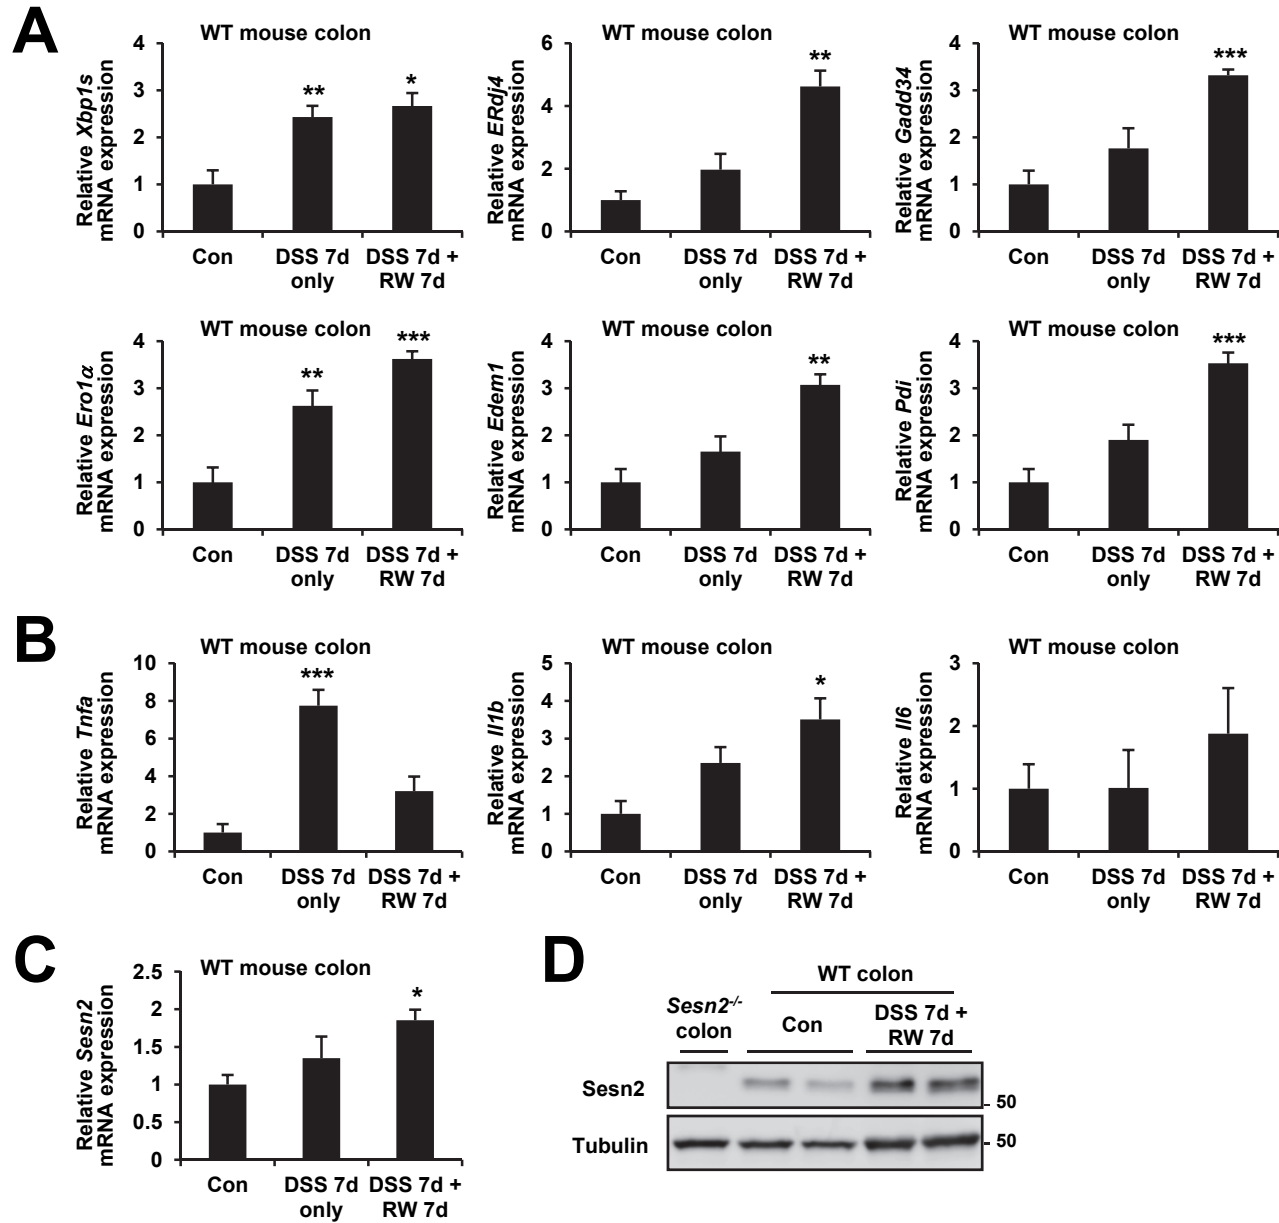

Supplement: supp [file elife-12204-supp-v1.zip]

Fig 6—figure supplement 1

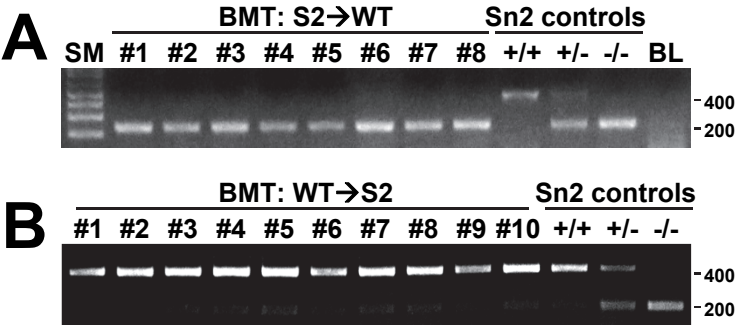

Supplement: supp [file elife-12204-supp-v1.zip]

# Fig 6—figure supplement 4

Fig. 6G

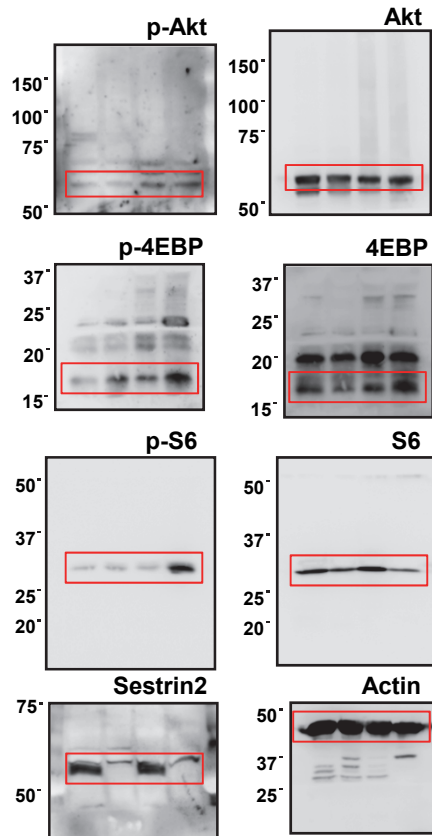

Fig. 6K

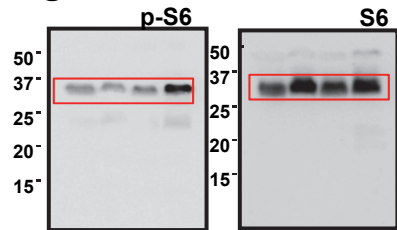

Fig. 6—figure supp. 3A

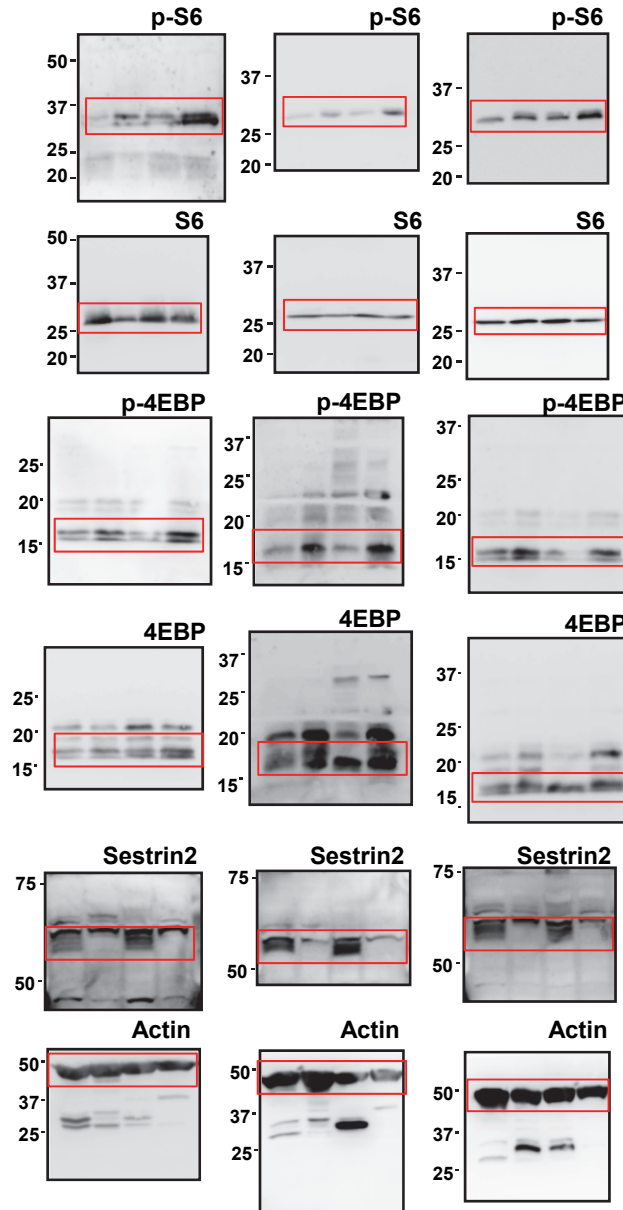

Fig. 6—figure supp. 3A

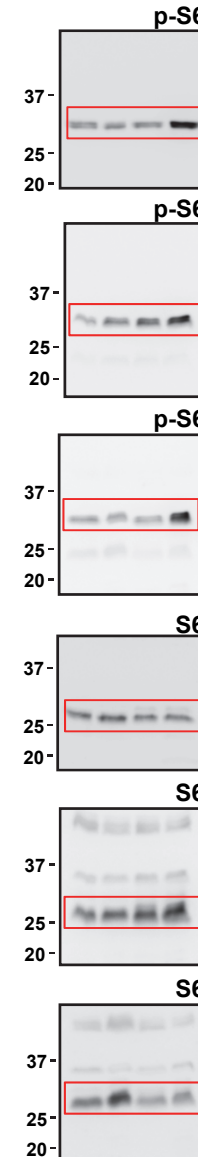

Supplement: supp [file elife-12204-supp-v1.zip]
